# Supplementary material
Source: PubMed Central journal article supplement (PMC6559943)
Supplement: NIHMS1526641-supplement-10439_2019_2263_MOESM4_ESM.pdf [file NIHMS1526641-supplement-10439_2019_2263_MOESM4_ESM.pdf]

**Supplemental Table S1. Direct effects of TNF- $\alpha$  on skeletal muscle.**

| <b>Isolated Tissue</b>                         | <b>Culture Conditions</b>                                                              | <b>Maximum Specific Force</b>                                                                                         | <b>Overall Protein Content</b>                                                                                                                              | <b>Myofibrillar Protein Content</b>                                                                                       | <b>Fusion Parameters</b>                                                                                                                                        |
|------------------------------------------------|----------------------------------------------------------------------------------------|-----------------------------------------------------------------------------------------------------------------------|-------------------------------------------------------------------------------------------------------------------------------------------------------------|---------------------------------------------------------------------------------------------------------------------------|-----------------------------------------------------------------------------------------------------------------------------------------------------------------|
| Costal diaphragm fibers; ICR mice <sup>3</sup> | Intraperitoneal injection of 2000 U/g*, 1hr prior to muscle excision                   | <i>Stimulated at 300 Hz</i><br>Control: 26 $\pm$ 2 N/cm <sup>2</sup><br>2000 U/g: 19 $\pm$ 2 N/cm <sup>2</sup>        | -                                                                                                                                                           | -                                                                                                                         | -                                                                                                                                                               |
| EDL muscle; guinea pig <sup>1</sup>            | Immersion of isolated muscle in 200 U/mL* of TNF $\alpha$ , 2hr prior to force testing | <i>Stimulated at 200 Hz</i><br>Control: 16.8 $\pm$ 1.6 N/cm <sup>2</sup><br>200 U/mL: 4.7 $\pm$ 1.0 N/cm <sup>2</sup> | -                                                                                                                                                           | -                                                                                                                         | -                                                                                                                                                               |
| EDL muscle; Sprague Dawley rats <sup>2</sup>   | Intravenous injection of 2400 U/mg**, 8hr prior to muscle excision                     | -                                                                                                                     | <i>Tyrosine release rate</i> #<br>Control: 105 $\pm$ 5 nmol/hr/g<br>2400 U/mg: 133 $\pm$ 7 nmol/hr/g                                                        | <i>Methylhistidine release rate</i> †<br>Control: 2.12 $\pm$ 0.17 nmol/hr/g<br>2400 U/mg: 3.00 $\pm$ 0.24 nmol/hr/g       | -                                                                                                                                                               |
| <b>In vitro culture</b>                        | <b>Culture Conditions</b>                                                              | <b>Maximum Specific Force</b>                                                                                         | <b>Overall Protein Content</b>                                                                                                                              | <b>Myofibrillar Protein Content</b>                                                                                       | <b>Fusion Parameters</b>                                                                                                                                        |
| C2C12 myoblasts <sup>4</sup>                   | 2, 20, 200 U/mL*, refreshed daily over 5 days                                          | -                                                                                                                     | <i>Protein per plate</i><br>Control: 359 $\pm$ 6 $\mu$ g<br>2 U/mL: 344 $\pm$ 10 $\mu$ g<br>20 U/mL: 309 $\pm$ 29 $\mu$ g<br>200 U/mL: 286 $\pm$ 32 $\mu$ g | Decreased MyHCf expression                                                                                                | <i>Percent of nuclei in cells with <math>\geq</math>3 nuclei</i><br>Control: 43 $\pm$ 2%<br>2 U/mL: 32 $\pm$ 2%<br>20 U/mL: 24 $\pm$ 1%<br>200 U/mL: 2 $\pm$ 1% |
| L6 myoblasts <sup>6</sup>                      | 2000 U/mL***, cultured for 5 days                                                      | -                                                                                                                     | -                                                                                                                                                           | Decreased presence of MHC isoforms in immunofluorescent images                                                            | <i>Percent nuclei in myosin heavy chain positive cells</i><br>Control: 19 $\pm$ 5%<br>2000 U/mL: 3 $\pm$ 1%                                                     |
| C2C12 myoblasts <sup>7</sup>                   | 20 U/mL*, cultured for 3 days                                                          | -                                                                                                                     | -                                                                                                                                                           | <i>MyHCf/GAPDH abundance based on Western blot analysis</i><br>Control: 0.72 $\pm$ 0.02 AU<br>20 U/mL: 0.02 $\pm$ 0.01 AU | <i>Percent nuclei in cells with <math>\geq</math>2 nuclei</i><br>Control: 26%<br>2000 U/mL: 19%                                                                 |
| C2C12 myoblasts <sup>5</sup>                   | 400 U/mL*, cultured for 5 days and refreshed 48 hours before measurements              | -                                                                                                                     | -                                                                                                                                                           | Decreased presence of MHC isoforms in immunofluorescent images                                                            | <i>Percent nuclei in cells with <math>\geq</math>2 nuclei</i><br>Control: 68 $\pm$ 3%<br>400 U/mL: 30 $\pm$ 3%                                                  |

All data reported as Mean  $\pm$  SEM;

\*Specific activity (SA) of murine recombinant TNF $\alpha$  was not reported in these studies. Concentrations (ng/mL) were converted using average activity reported by the manufacturers of 2\*10<sup>7</sup> U/mg; \*\*Converted using reported SA of 8\*10<sup>6</sup> U/ $\mu$ g (human recombinant TNF $\alpha$ ); \*\*\*Converted using reported SA of 4\*10<sup>8</sup> U/mg.

#Tyrosine release rate is indicative of overall protein catalysis; †Methylhistidine release rate is indicative of myofibrillar protein catalysis.

## References

1. Alloatti G, Penna C, Mariano F, Camussi G. Role of NO and PAF in the impairment of skeletal muscle contractility induced by TNF-alpha. *American journal of physiology. Regulatory, integrative and comparative physiology.* 279:R2156-2163, 2000.
2. Goodman MN. Tumor necrosis factor induces skeletal muscle protein breakdown in rats. *Am J Physiol.* 260:E727-730, 1991.
3. Hardin BJ, Campbell KS, Smith JD, et al. TNF-alpha acts via TNFR1 and muscle-derived oxidants to depress myofibrillar force in murine skeletal muscle. *Journal of applied physiology (Bethesda, Md. : 1985).* 104:694-699, 2008.
4. Langen RC, Schols AM, Kelders MC, Wouters EF, Janssen-Heininger YM. Inflammatory cytokines inhibit myogenic differentiation through activation of nuclear factor-kappaB. *FASEB journal : official publication of the Federation of American Societies for Experimental Biology.* 15:1169-1180, 2001.
5. Magee P, Pearson S, Allen J. The omega-3 fatty acid, eicosapentaenoic acid (EPA), prevents the damaging effects of tumour necrosis factor (TNF)-alpha during murine skeletal muscle cell differentiation. *Lipids in health and disease.* 7:24, 2008.
6. Moresi V, Adamo S, Coletti D. Bimodal effects of TNF- $\alpha$  on differentiation and hypertrophy of skeletal muscle cell cultures *Basic Appl Myol.* 16:163-168, 2006.
7. Verhees KJ, Pansters NA, Baarsma HA, et al. Pharmacological inhibition of GSK-3 in a guinea pig model of LPS-induced pulmonary inflammation: II. Effects on skeletal muscle atrophy. *Respir Res.* 14:117, 2013.
